# Supplementary material for: Uterine epithelial Gp130 orchestrates hormone response and epithelial remodeling for successful embryo attachment in mice
Source: PubMed Central journal article supplement (PMC9842754; doi:10.1038/s41598-023-27859-y), 2023-01-16
Supplement: 41598_2023_27859_MOESM2_ESM.pdf [file 41598_2023_27859_MOESM2_ESM.pdf]

Supplemental table 1. List of mouse phenotype with altered LIFR/Gp130 – STAT3 signals

| Gene                             | Defective uterine part | Genotype                           | Embryo implantation    | Proliferation of the uterine epithelial cells | STAT3 status in the uterine epithelium | Reference      |
|----------------------------------|------------------------|------------------------------------|------------------------|-----------------------------------------------|----------------------------------------|----------------|
| <i>Stat3</i>                     | Whole uterus           | <i>Pgr<sup>Cre</sup>-Stat3</i>     | Failure                | Sustained                                     | Non-phosphorylated                     | PMID: 23885093 |
|                                  | Whole uterus           | <i>Pgr<sup>Cre</sup>-Stat3</i>     | Failure                | Sustained                                     | ND                                     | PMID: 32968170 |
|                                  | Whole uterus           | <i>Pgr<sup>iresCre</sup>-Stat3</i> | Failure                | ND                                            | ND                                     | PMID: 34402137 |
|                                  | Uterine epithelium     | <i>Wnt7a-Cre-Stat3</i>             | Failure                | ND                                            | ND                                     | PMID: 24100212 |
|                                  | Uterine epithelium     | <i>Ltf<sup>Cre</sup>-Stat3</i>     | Failure                | Suppressed                                    | Non-phosphorylated                     | PMID: 32968170 |
|                                  | Stroma                 | <i>Amhr2<sup>Cre</sup>-Stat3</i>   | Embryonic resorption   | ND                                            | ND                                     | PMID: 24983622 |
|                                  | Stroma                 | <i>Amhr2<sup>Cre</sup>-Stat3</i>   | Failure                | Sustained                                     | Phosphorylated                         | PMID: 32968170 |
| <i>Lifr</i>                      | Uterine epithelium     | <i>Ltf<sup>Cre</sup>-Lifr</i>      | Severe loss of litters | ND                                            | Non-phosphorylated                     | PMID: 28368537 |
|                                  | Uterine epithelium     | <i>Ltf<sup>Cre</sup>-Lifr</i>      | Failure                | Suppressed                                    | Non-phosphorylated                     | PMID: 34402888 |
|                                  | Stroma                 | <i>Amhr2<sup>Cre</sup>-Lifr</i>    | No phenotype           | Suppressed                                    | Phosphorylated                         | PMID: 34402888 |
| <i>Gp130</i><br>( <i>Il6st</i> ) | Whole uterus           | <i>Pgr<sup>Cre</sup>-Gp130</i>     | Failure                | Sustained                                     | ND                                     | PMID: 23885093 |
|                                  | Whole uterus           | <i>Pgr<sup>iresCre</sup>-Gp130</i> | Failure                | ND                                            | ND                                     | PMID: 34402137 |
|                                  | Uterine epithelium     | <i>Ltf<sup>Cre</sup>-Gp130</i>     | Failure                | Suppressed                                    | Non-phosphorylated                     | Present study  |

ND, not determined
